# Supplementary material
Source: PubMed Central journal article supplement (PMC4035109)
Supplement: NIHMS317910-supplement-01.pdf [file NIHMS317910-supplement-01.pdf]

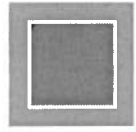

# THE JOURNAL OF CLINICAL PSYCHIATRY

## **Supplementary Material**

**Article Title:** Clinical and Cognitive Correlates of Suicide Attempts in Bipolar Disorder: Is Suicide Predictable?

**Author(s):** Alison M. Gilbert, PhD; Jessica L. Garno, PhD; Raphael J. Braga, MD; Yaniv Shaya, MA; Terry E. Goldberg, PhD; Anil K. Malhotra, MD; and Katherine E. Burdick, PhD

**DOI Number:** 10.4088/JCP.10m06410

### **List of Supplementary Material for the article**

1. **eTable 1** Factor Loadings from the Unrotated Principal Components Analysis (Factor Analysis) of the Neurocognitive Variables

### **Disclaimer**

This Supplementary Material has been provided by the author(s) as an enhancement to the published article. It has been approved by peer review; however, it has undergone neither editing nor formatting by in-house editorial staff. The material is presented in the manner supplied by the author.

**eTable 1.** Factor Loadings from the Unrotated Principal Components Analysis (Factor Analysis) of the Neurocognitive Variables.

**Total Variance Explained**

| Component | Initial Eigenvalues |               |              | Extraction Sums of Squared Loadings |               |              |
|-----------|---------------------|---------------|--------------|-------------------------------------|---------------|--------------|
|           | Total               | % of Variance | Cumulative % | Total                               | % of Variance | Cumulative % |
| 1         | 4.717               | 29.482        | 29.482       | 4.717                               | 29.482        | 29.482       |
| 2         | 2.237               | 13.982        | 43.464       | 2.237                               | 13.982        | 43.464       |
| 3         | 1.490               | 9.312         | 52.776       | 1.490                               | 9.312         | 52.776       |
| 4         | 1.344               | 8.398         | 61.174       | 1.344                               | 8.398         | 61.174       |
| 5         | 1.044               | 6.522         | 67.696       | 1.044                               | 6.522         | 67.696       |

Extraction Method: Principal Component Analysis.

**Component Matrix**

| Test                      | Component |       |       |       |       |
|---------------------------|-----------|-------|-------|-------|-------|
|                           | 1         | 2     | 3     | 4     | 5     |
| ANT Alerting              | .062      | .417  | .311  | -.431 | -.583 |
| ANT Orienting             | -.035     | .713  | .245  | .434  | -.123 |
| ANT Conflict              | -.133     | .212  | .617  | -.415 | .114  |
| WRATReading               | .520      | .092  | -.457 | .422  | -.333 |
| Digit span                | .175      | .732  | .256  | .193  | .097  |
| Digit Symbol              | .616      | -.395 | -.113 | -.342 | -.240 |
| Stroop Word               | .669      | -.450 | .298  | .126  | -.060 |
| Stroop Color              | .744      | .015  | .244  | .009  | .175  |
| Stroop ColorWord          | .806      | .238  | -.030 | -.212 | .285  |
| Stroop Interference       | .326      | .489  | -.400 | -.303 | .424  |
| Trails A time             | -.675     | .108  | -.167 | .062  | .118  |
| Trails B time             | -.749     | -.145 | .097  | .055  | .257  |
| Letter fluency            | .645      | -.136 | .263  | .215  | -.047 |
| WCST Categories Completed | .642      | .313  | -.409 | -.267 | .005  |
| Animal fluency            | .484      | -.372 | .282  | .136  | .340  |
| CVLT Delayed Recall       | .422      | .153  | .054  | .412  | .067  |

Extraction Method: Principal Component Analysis: 5 components extracted with eigenvalues>1.
